# Supplementary material for: Impact of an Antimicrobial Stewardship Program on the Incidence of Carbapenem Resistant Gram-Negative Bacilli: An Interrupted Time-Series Analysis
Source: MDPI journal article supplement (doi:10.3390/antibiotics10050586), 2021-05-16
Supplement: s1 [file s1]

## Supplementary material

***Supplementary Table S1. Breakdown of monthly admitted patients***

| Month    | Total Patients | OBDs  |
|----------|----------------|-------|
| Jan-2013 | 3194           | 23594 |
| Feb-2013 | 3319           | 22799 |
| Mar-2013 | 3427           | 24573 |
| Apr-2013 | 3643           | 23946 |
| May-2013 | 3545           | 23962 |
| Jun-2013 | 3394           | 23886 |
| Jul-2013 | 3278           | 22410 |
| Aug-2013 | 2626           | 19133 |
| Sep-2013 | 2771           | 19249 |
| Oct-2013 | 3515           | 22783 |
| Nov-2013 | 3339           | 22635 |
| Dec-2013 | 3242           | 22275 |
| Jan-2014 | 3445           | 23586 |
| Feb-2014 | 3380           | 21642 |
| Mar-2014 | 3540           | 23431 |
| Apr-2014 | 3464           | 22006 |
| May-2014 | 3537           | 23110 |
| Jun-2014 | 3431           | 22414 |
| Jul-2014 | 3325           | 22122 |
| Aug-2014 | 2593           | 18786 |
| Sep-2014 | 2954           | 20007 |
| Oct-2014 | 3476           | 22558 |
| Nov-2014 | 3492           | 23006 |
| Dec-2014 | 3309           | 21452 |
| Jan-2015 | 3340           | 23636 |
| Feb-2015 | 3604           | 23524 |
| Mar-2015 | 3744           | 23816 |
| Apr-2015 | 3451           | 21960 |
| May-2015 | 3448           | 22693 |
| Jun-2015 | 3587           | 22453 |
| Jul-2015 | 3291           | 21110 |
| Aug-2015 | 2594           | 18845 |
| Sep-2015 | 2928           | 19862 |
| Oct-2015 | 3495           | 22215 |
| Nov-2015 | 3437           | 22806 |
| Dec-2015 | 3336           | 21627 |
| Jan-2016 | 3026           | 23346 |
| Feb-2016 | 3327           | 23333 |

OBDs: occupied bed days

**Supplementary Table S2. Joinpoint regression analysis of antibiotic consumption**

| DDDs/1000 OBDs                                                                         | Pre-intervention trend<br>MPC<br>[95% CI]<br>(p-value) | Point of<br>change 1<br>Month<br>[95% CI]<br>(p-value) | Intervention<br>trend 1<br>MPC<br>[95% CI]<br>(p-value) | Point of<br>change 2<br>Month<br>[95% CI]<br>(p-value) | Intervention<br>trend 2<br>MPC<br>[95% CI]<br>(p-value) |
|----------------------------------------------------------------------------------------|--------------------------------------------------------|--------------------------------------------------------|---------------------------------------------------------|--------------------------------------------------------|---------------------------------------------------------|
| <b>Total antibiotics<br/>(ATC- J01)</b>                                                | -0.09%<br>[-0.62, 0.43]<br>(p=0.713)                   | 17<br>[10, 33]<br>(p<0.05)                             | -0.74%<br>[-1.11, -0.36]<br>(p<0.001)                   | ...                                                    | ...                                                     |
| <b>Carbapenems</b>                                                                     | -0.91%<br>[-2.80, 1.01]<br>(p=0.339)                   | 13<br>[11, 14]<br>(p<0.05)                             | -28.10%<br>[-63.66, 42.24]<br>(p=0.331)                 | 16<br>[14, 19]<br>(p<0.05)                             | -2.62%<br>[-4.06, -1.16]<br>(p=0.001)                   |
| <b>Cephalosporins</b>                                                                  | 2.59%<br>[1.49, 3.71]<br>(p<0.001)                     | 16<br>[11, 28]<br>(p<0.05)                             | 0.17%<br>[-0.39, 0.73]<br>(p=0.550)                     | ...                                                    | ...                                                     |
| <b><math>\beta</math>-lactams and <math>\beta</math>-<br/>lactamase<br/>inhibitors</b> | -2.30%<br>[-3.07, -1.53]<br>(p<0.001)                  | 11<br>[7, 13]<br>(p<0.05)                              | 6.58%<br>[-6.04, 20.89]<br>(p=0.309)                    | 14<br>[13, 22]<br>(p<0.05)                             | -0.05%<br>[-0.25, 0.15]<br>(p=0.606)                    |
| <b>Quinolones</b>                                                                      | -0.71%<br>[-0.96, -0.46]<br>(p<0.001)                  | ...                                                    | ...                                                     | ...                                                    | ...                                                     |
| <b>Aminoglycosides</b>                                                                 | -0.52%<br>[-1.03, -0.01]<br>(p=0.044)                  | ...                                                    | ...                                                     | ...                                                    | ...                                                     |

MPC: monthly percentage change. CI: confidence interval

**Supplementary Table S3. Joinpoint regression analysis of the incidence density of carbapenem resistant-gram negative bacilli**

| <i>Incidence density</i>                              | <i>Pre- intervention trend</i><br><i>MPC</i><br><i>[95% CI]</i><br><i>(p-value)</i> | <i>Point of change 1</i><br><i>Month</i><br><i>[95% CI]</i><br><i>(p-value)</i> | <i>Intervention trend 1</i><br><i>MPC</i><br><i>[95% CI]</i><br><i>(p-value)</i> | <i>Point of change 2</i><br><i>Month</i><br><i>[95% CI]</i><br><i>(p-value)</i> | <i>Intervention trend 2</i><br><i>MPC</i><br><i>[95% CI]</i><br><i>(p-value)</i> |
|-------------------------------------------------------|-------------------------------------------------------------------------------------|---------------------------------------------------------------------------------|----------------------------------------------------------------------------------|---------------------------------------------------------------------------------|----------------------------------------------------------------------------------|
| <b>Global CR-GNB</b>                                  | 0.39%<br>[-2.91, 3.80]<br>(p=0.81)                                                  | 14<br>[10, 17]<br>(p<0.05)                                                      | -6.06%<br>[-7.81, -4.27]<br>(p<0.001)                                            | ...                                                                             | ...                                                                              |
| <b>Klebsiella pneumoniae</b>                          | 4.58%<br>[-0.58, 10]<br>(p=0.081)                                                   | 14<br>[10, 18]<br>(p<0.05)                                                      | -6.53%<br>[-8.91, -4.09]<br>(p<0.001)                                            | ...                                                                             | ...                                                                              |
| <b>Other Enterobacteriaceae</b>                       | 1.43%<br>[-1.63, 4.59]<br>(p=0.350)                                                 | 15<br>[3, 18]<br>(p<0.05)                                                       | -18.89%<br>[-76.48, 179.66]<br>(p=0.732)                                         | 18<br>[8, 36]<br>(p<0.05)                                                       | -2.37%<br>[-5.33, 0.69]<br>(p=0.123)                                             |
| <b>Escherichia coli</b>                               | 3.55%<br>0.59, 6.59]<br>(p=0.019)                                                   | 15<br>[3, 17]<br>(p<0.05)                                                       | -16.90%                                                                          | 18<br>[6, 36]<br>(p<0.05)                                                       | -2.56%<br>-5.42, 0.39]<br>(p=0.086)                                              |
| <b>Proteus mirabilis</b>                              | -2.36%<br>[-3.79, -0.89]<br>(p=0.002)                                               | ...                                                                             | ...                                                                              | ...                                                                             | ...                                                                              |
| <b>Klebsiella aerogenes/<br/>Enterobacter cloacae</b> | -1.65%<br>[-2.35, -0.94]<br>(p<0.001)                                               | ...                                                                             | ...                                                                              | ...                                                                             | ...                                                                              |
| <b>Pseudomonas aeruginosa</b>                         | -2.41%<br>[-3.82, -0.97]<br>(p=0.002)                                               | ...                                                                             | ...                                                                              | ...                                                                             | ...                                                                              |
| <b>Acinetobacter baumannii</b>                        | -7.03%<br>[-8.78, -5.25]<br>(p<0.001)                                               | ...                                                                             | ...                                                                              | ...                                                                             | ...                                                                              |

CR-GNB: carbapenem-resistant gram negative bacilli. MPC: monthly percentage change. CI: confidence interval

**Supplementary Table S4. Proportion of carbapenem-resistant *Escherichia coli* per year**

| Year  | Number of <i>E. coli</i> isolates | Number of CR-producing<br><i>E. coli</i> | Resistance proportion (%) |
|-------|-----------------------------------|------------------------------------------|---------------------------|
| 2013  | 393                               | 24                                       | 6.1%                      |
| 2014  | 355                               | 20                                       | 5.6%                      |
| 2015  | 326                               | 10                                       | 3.1%                      |
| 2016* | 36                                | 2                                        | 5.6%                      |

\* Data for 2016 correspond only to the months included in the study period: January and February.

**Supplementary Table S5. Interrupted time-series analysis of changes in hand hygiene compliance**

| Regression intercept | Pre-intervention trend | Change in Level <sup>a</sup> | Change in Trend <sup>b</sup> | Absolute effect <sup>c</sup> | Relative effect (%) <sup>c</sup> |
|----------------------|------------------------|------------------------------|------------------------------|------------------------------|----------------------------------|
| 67.14                | -0.308                 | 1.085                        | 0.014                        | 1.432                        | 2.583                            |
|                      | (-0.576, -0.040)       | (-1.145, 3.314)              | (-0.240, 0.268)              | (-6.657, 9.520)              | (-12.48, 17.65)                  |

Data are presented as monthly hand hygiene compliance with 95% confidence interval, unless otherwise specified. <sup>a</sup> Increase or decrease in the first month after the start of the intervention period with respect to the expected value. <sup>b</sup> Change in slope for the intervention period. <sup>c</sup> Absolute or percentage difference between the expected value according to the pre-intervention trend of hand hygiene compliance and the trend two years after the start of the intervention.

**Supplementary Figure S1. Joinpoint regression analysis of carbapenem/ATC-J01 consumption**

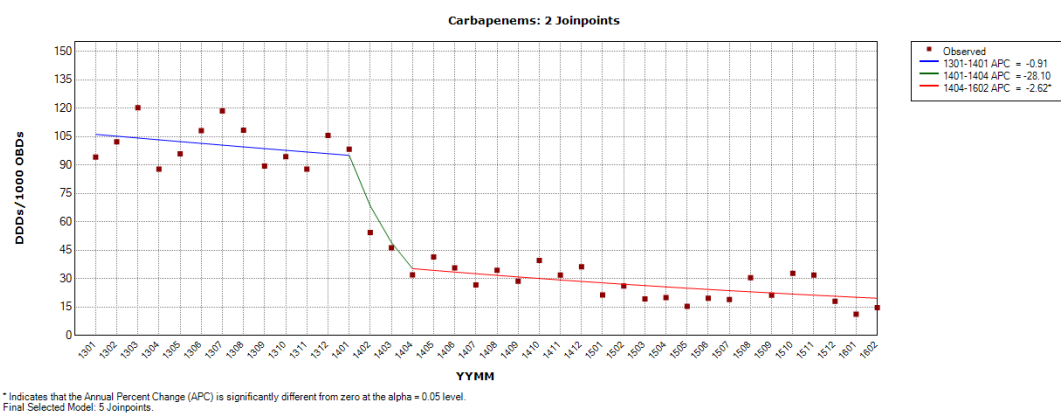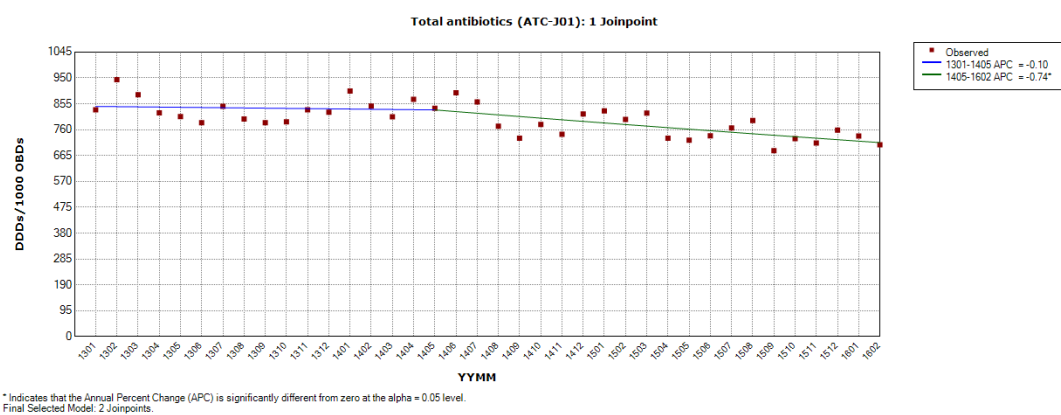

Date are presented as monthly defined daily doses (DDD) per 1000 occupied bed days (OBDs).

**Supplementary Figure S2. Interrupted time-series analysis of changes in consumption of other antibiotics**

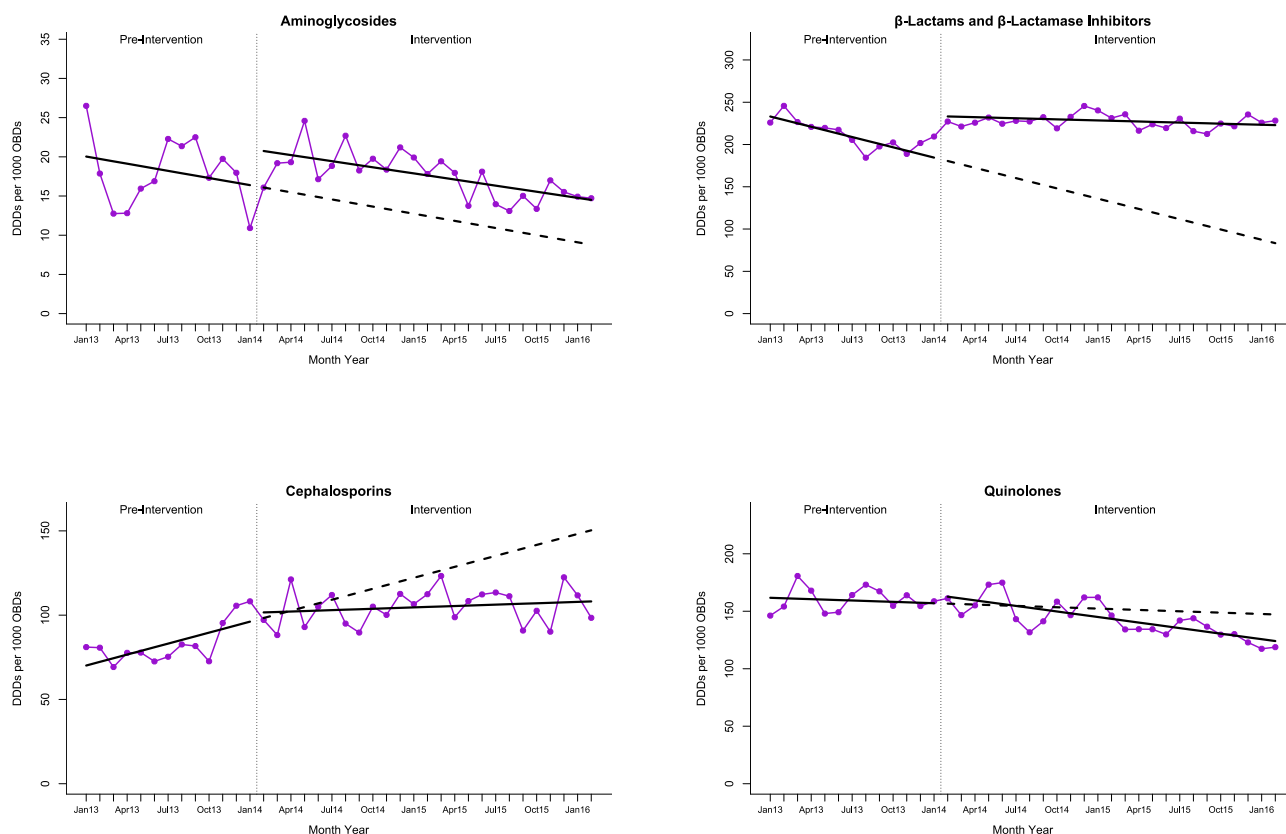

Date are presented as monthly defined daily doses (DDD) per 1000 occupied bed days (OBDs).

**Solid purple line:** antibiotic consumption time series. **Solid black lines:** pre-intervention and intervention trends.

**Dashed black line:** counterfactual (expected) trend

**Supplementary Figure S3. Joinpoint regression analysis of the incidence density of carbapenem-resistant gram negative bacilli**

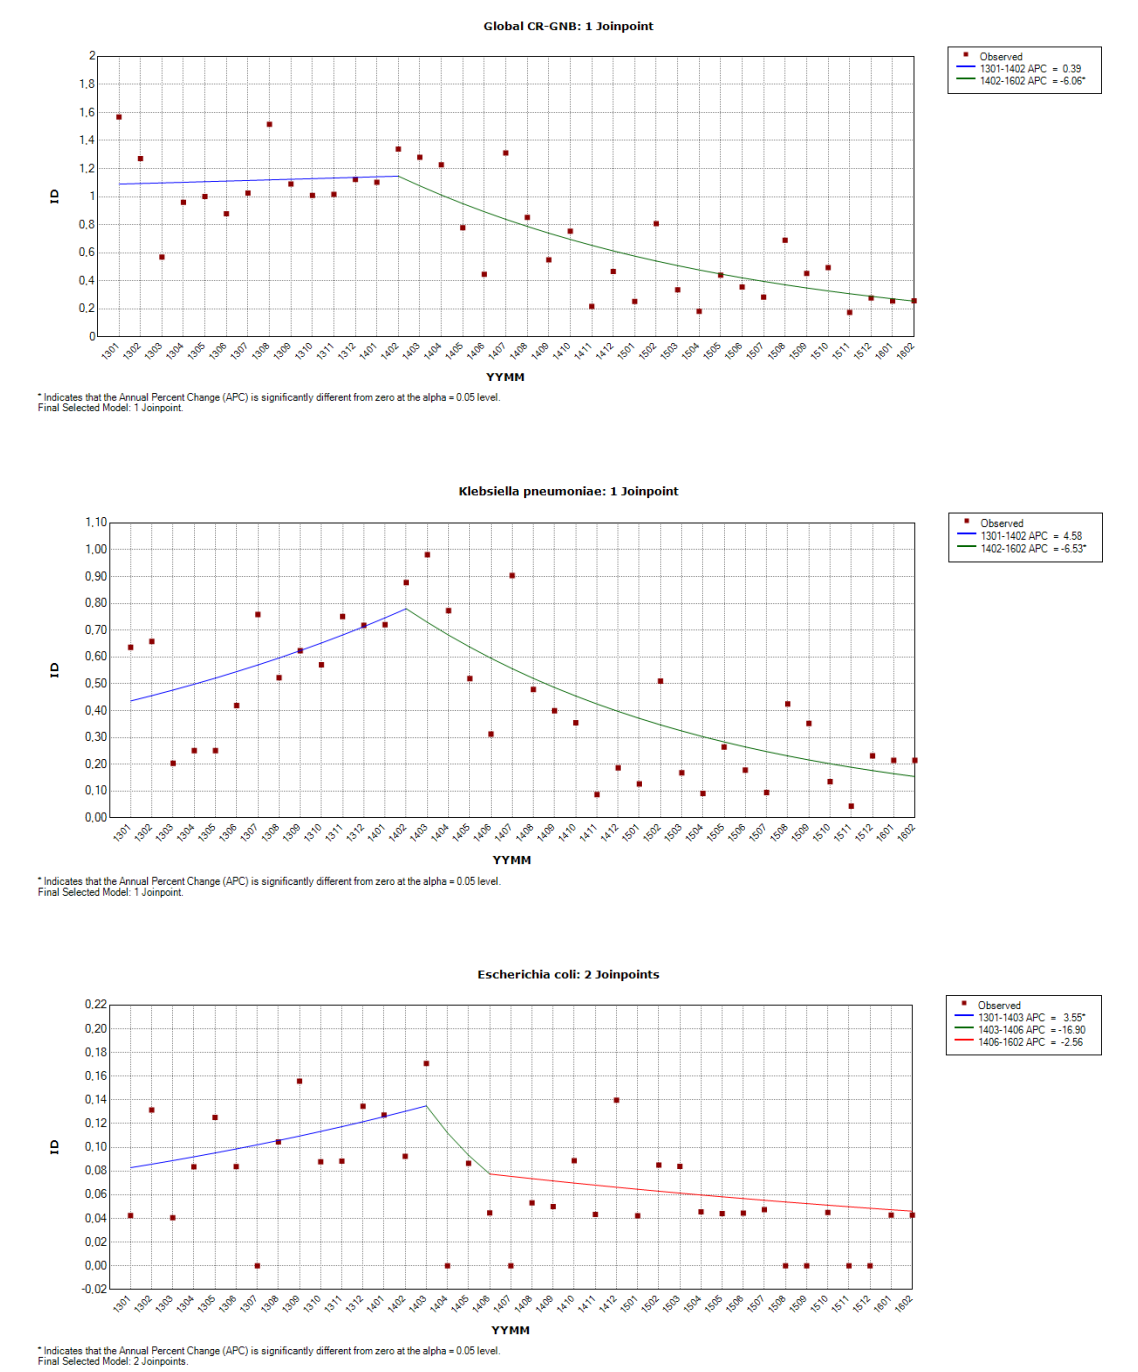

ID: Incidence density. YYMM: year, month

**Supplementary Figure S4. Interrupted time-series analysis of changes in incidence density of other carbapenem-resistant Gram-negative bacilli**

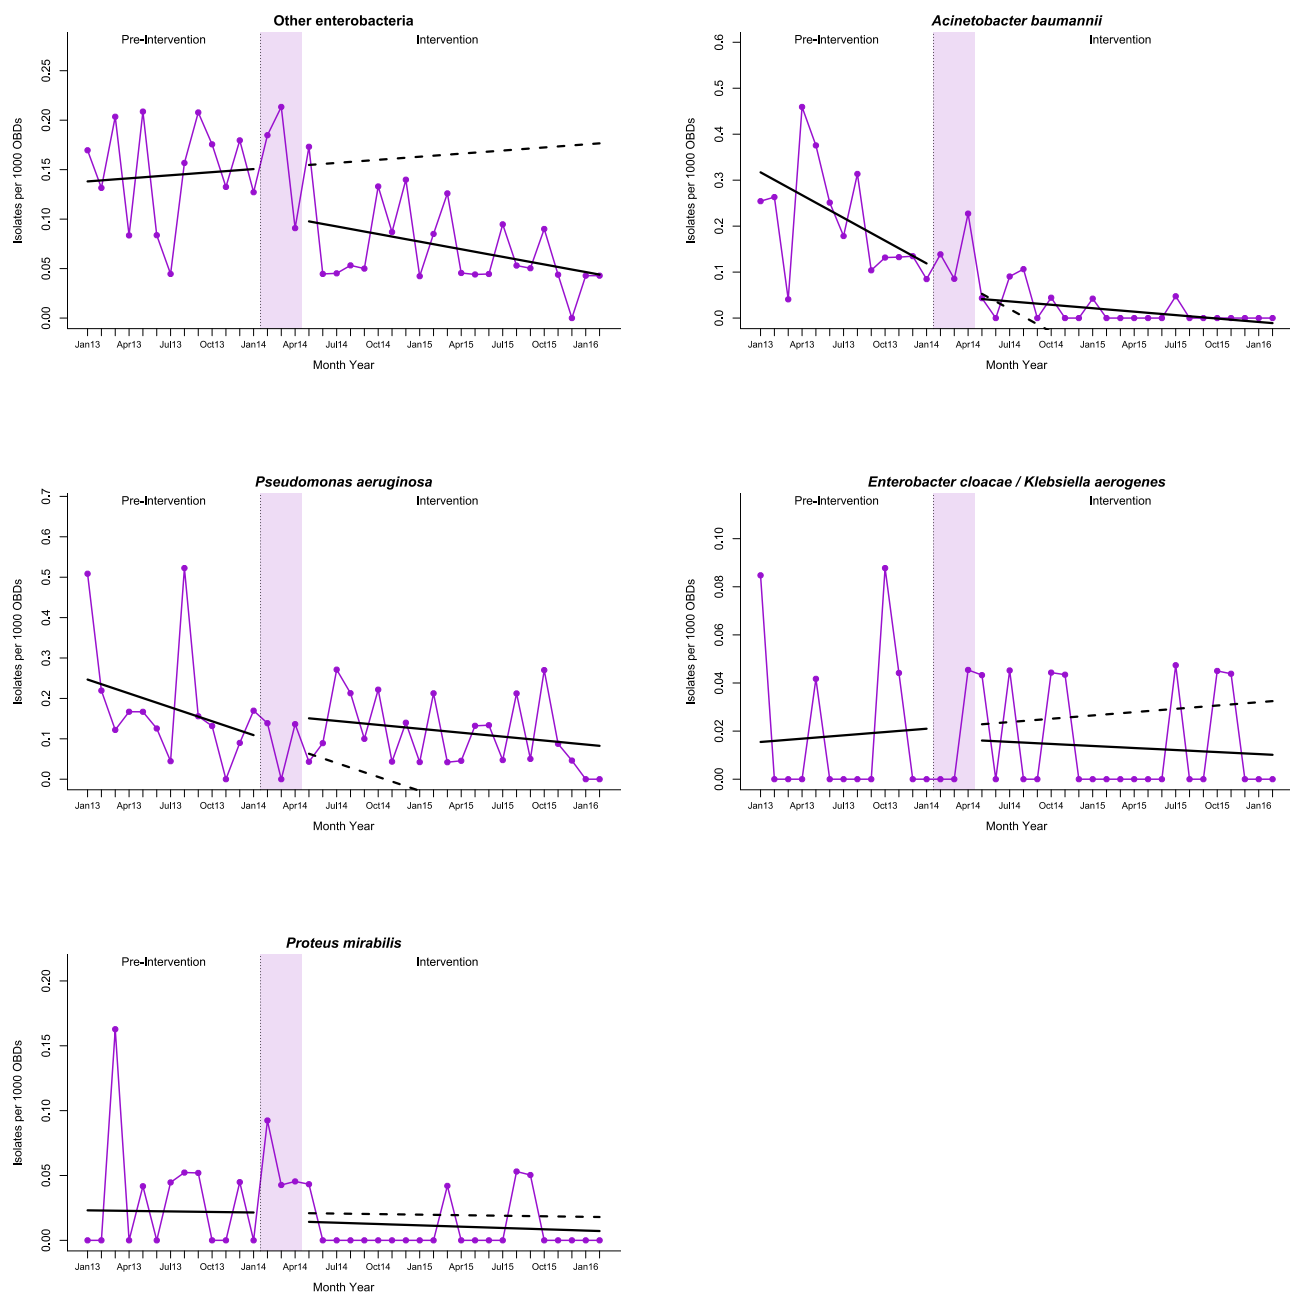

Date are presented as monthly isolates per 1000 occupied bed days (OBDs).

**Solid purple line:** CR-GNB incidence density time series. **Solid black lines:** pre-intervention and intervention trends. **Dashed black line:** counterfactual



**Supplementary Figure S5. Joinpoint regression analysis of 14-day crude death rate**

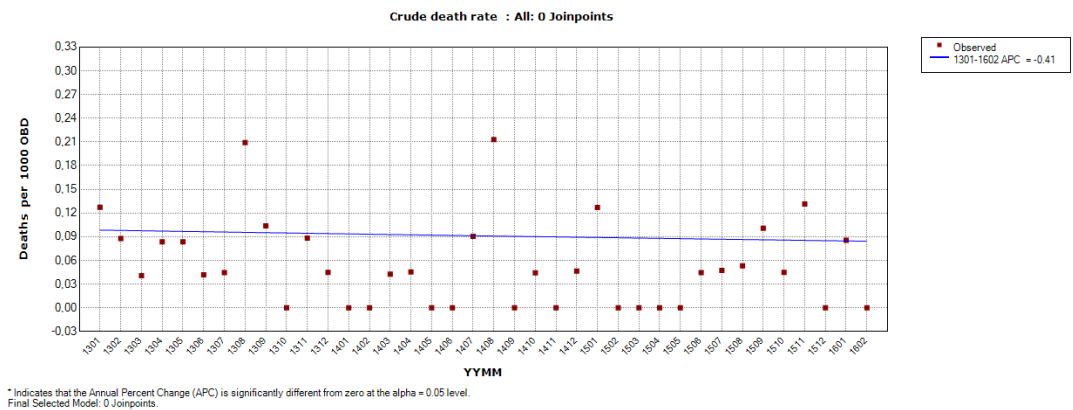

OBDs: occupied bed days

**Supplementary Figure S6. Joinpoint regression analysis of hand hygiene compliance**

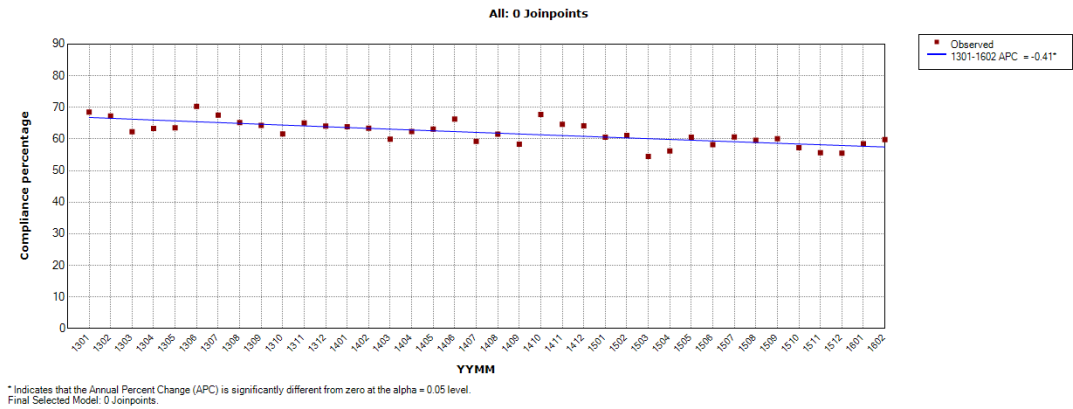

YYMM: year, month

**Supplementary Figure S7. Joinpoint regression analysis of complexity indicators associated with healthcare during the study period**

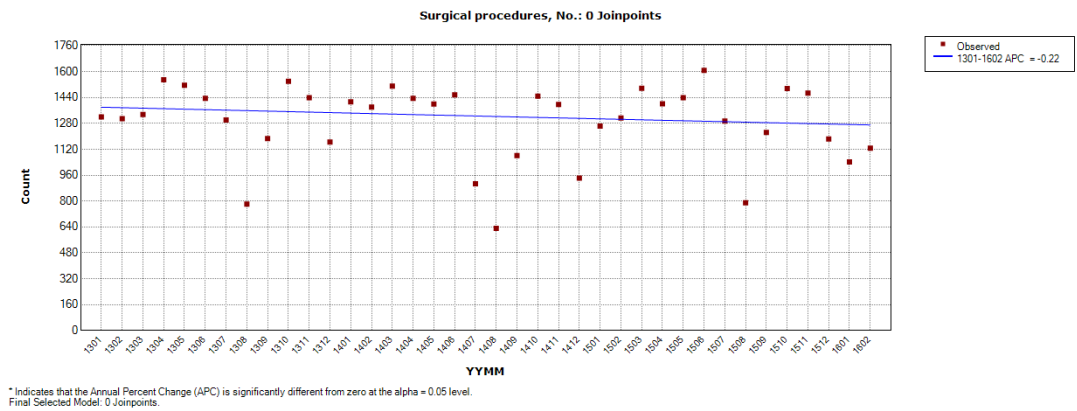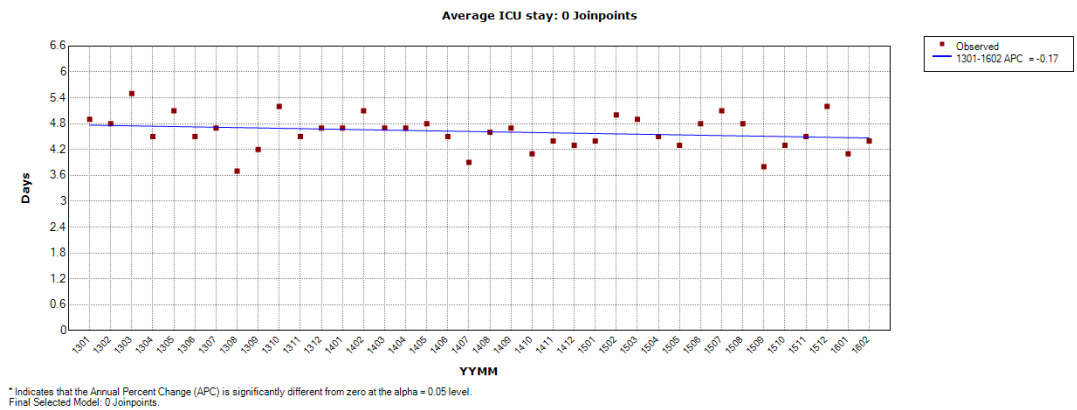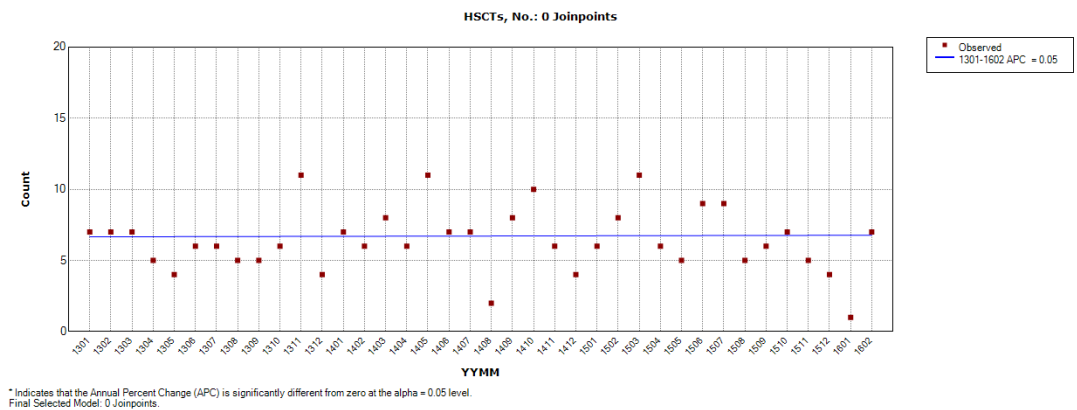

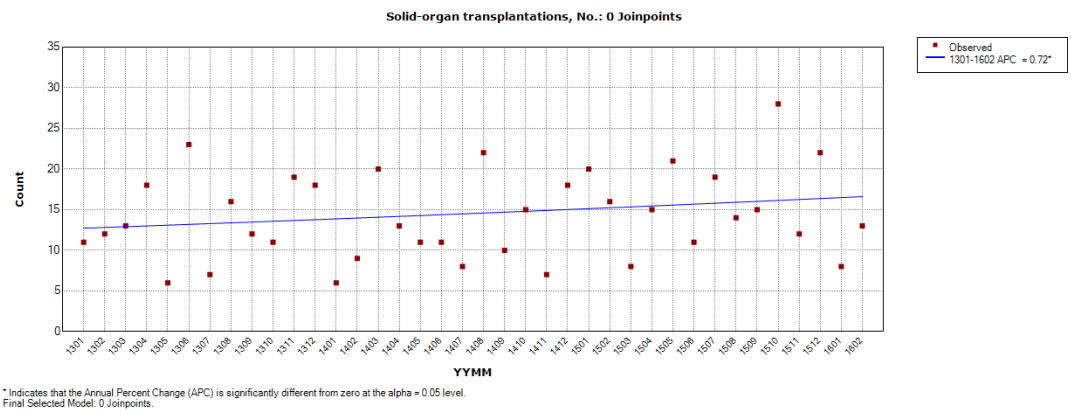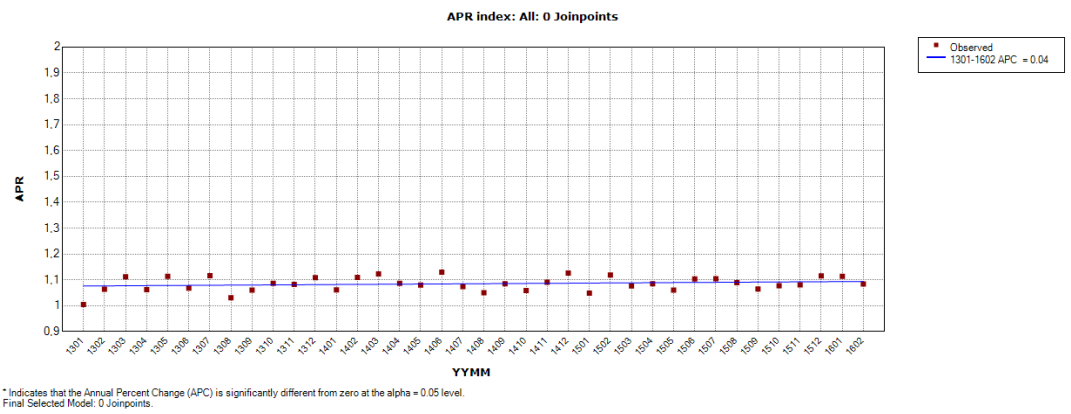

YYMM: year, month
